# Supplementary material for: Multi-technique computational assessment of fluoride uptake in enamel using PIGE, NEXAFS, and Raman spectroscopy
Source: Royal Society of Chemistry journal article supplement (doi:10.1039/d5tb00213c), 2025-01-01
Supplement: d5tb00213c1.pdf [file d5tb00213c1.pdf]

## Statement

The samples used for this study were not obtained commercially. The human teeth samples will be acquired from the biobank of the GIBBO-LIBPhys lab belonging to the Faculty of Dentistry of University of Lisbon. These samples are donated anonymously from patients who were subjected to extraction due to orthodontic or periodontal disease treatments. There were no tracking or further information regarding the donors.

Data will be available upon reasonable request.
